# Supplementary material for: Predicting trajectories of acute illness using RNA velocity of whole blood
Source: Research Square preprint supplement (doi:10.21203/rs.3.rs-5764288/v1), 2025-02-03
Supplement: Supplementary file 1 [file 464a873c9aaf6a726813cd33.xlsx]

## Sheet: Supplementary Data File. 1
Ensembl ID	Gene Symbol	*NA indicates unknown gene symbols
ENSG00000238009	NA
ENSG00000237491	LINC01409
ENSG00000169972	PUSL1
ENSG00000160075	SSU72
ENSG00000078369	GNB1
ENSG00000157916	RER1
ENSG00000225931	NA
ENSG00000116254	CHD5
ENSG00000049239	H6PD
ENSG00000188807	TMEM201
ENSG00000171608	PIK3CD
ENSG00000171603	CLSTN1
ENSG00000162444	RBP7
ENSG00000116649	SRM
ENSG00000120942	UBIAD1
ENSG00000204624	DISP3
ENSG00000116663	FBXO6
ENSG00000177674	AGTRAP
ENSG00000142634	EFHD2
ENSG00000116771	AGMAT
ENSG00000116786	PLEKHM2
ENSG00000162461	SLC25A34
ENSG00000117115	PADI2
ENSG00000179051	RCC2
ENSG00000077549	CAPZB
ENSG00000162551	ALPL
ENSG00000233431	LINC02596
ENSG00000173372	C1QA
ENSG00000159189	C1QC
ENSG00000173369	C1QB
ENSG00000117602	RCAN3
ENSG00000233755	NA
ENSG00000204178	MACO1
ENSG00000157978	LDLRAP1
ENSG00000175087	PDIK1L
ENSG00000142675	CNKSR1
ENSG00000204160	ZDHHC18
ENSG00000214812	NA
ENSG00000169403	PTAFR
ENSG00000182866	LCK
ENSG00000134684	YARS1
ENSG00000142920	AZIN2
ENSG00000184389	A3GALT2
ENSG00000142686	C1orf216
ENSG00000134698	AGO4
ENSG00000092847	AGO1
ENSG00000196182	STK40
ENSG00000163874	ZC3H12A
ENSG00000174574	AKIRIN1
ENSG00000131238	PPT1
ENSG00000187815	ZFP69
ENSG00000010803	SCMH1
ENSG00000171960	PPIH
ENSG00000117385	P3H1
ENSG00000236200	NA
ENSG00000132768	DPH2
ENSG00000225721	NA
ENSG00000222009	BTBD19
ENSG00000132773	TOE1
ENSG00000232022	NA
ENSG00000159658	EFCAB14
ENSG00000116221	MRPL37
ENSG00000177606	JUN
ENSG00000116704	SLC35D1
ENSG00000116754	SRSF11
ENSG00000162620	LRRIQ3
ENSG00000178965	ERICH3
ENSG00000116791	CRYZ
ENSG00000057468	MSH4
ENSG00000184005	ST6GALNAC3
ENSG00000036549	ZZZ3
ENSG00000230817	LINC01362
ENSG00000117133	RPF1
ENSG00000117155	SSX2IP
ENSG00000117174	ZNHIT6
ENSG00000097033	SH3GLB1
ENSG00000154451	GBP5
ENSG00000183347	GBP6
ENSG00000162664	ZNF326
ENSG00000122482	ZNF644
ENSG00000137936	BCAR3
ENSG00000143036	SLC44A3
ENSG00000226026	RWDD3-DT
ENSG00000162688	AGL
ENSG00000122477	LRRC39
ENSG00000162692	VCAM1
ENSG00000231671	LINC01307
ENSG00000198890	PRMT6
ENSG00000162639	HENMT1
ENSG00000221986	MYBPHL
ENSG00000134243	SORT1
ENSG00000181754	AMIGO1
ENSG00000065135	GNAI3
ENSG00000143119	CD53
ENSG00000162777	DENND2D
ENSG00000116473	RAP1A
ENSG00000155380	SLC16A1
ENSG00000163393	SLC22A15
ENSG00000173212	MAB21L3
ENSG00000224950	NA
ENSG00000116824	CD2
ENSG00000134256	CD101
ENSG00000227712	NA
ENSG00000134250	NOTCH2
ENSG00000198019	FCGR1BP
ENSG00000265531	FCGR1CP
ENSG00000117281	CD160
ENSG00000211451	GNRHR2
ENSG00000271601	LIX1L
ENSG00000150337	FCGR1A
ENSG00000270882	H4C14
ENSG00000159164	SV2A
ENSG00000264522	OTUD7B
ENSG00000143374	TARS2
ENSG00000143457	GOLPH3L
ENSG00000163141	BNIPL
ENSG00000197622	CDC42SE1
ENSG00000213190	MLLT11
ENSG00000143458	GABPB2
ENSG00000143398	PIP5K1A
ENSG00000159377	PSMB4
ENSG00000227045	NA
ENSG00000196407	THEM5
ENSG00000159445	THEM4
ENSG00000163221	S100A12
ENSG00000143612	C1orf43
ENSG00000160712	IL6R
ENSG00000273110	NA
ENSG00000143603	KCNN3
ENSG00000160688	FLAD1
ENSG00000169231	THBS3
ENSG00000173171	MTX1
ENSG00000143622	RIT1
ENSG00000273002	ARHGEF2-AS2
ENSG00000160803	UBQLN4
ENSG00000116586	LAMTOR2
ENSG00000163472	TMEM79
ENSG00000160818	GPATCH4
ENSG00000229953	NA
ENSG00000027869	SH2D2A
ENSG00000229961	LOC107985211
ENSG00000160856	FCRL3
ENSG00000163563	MNDA
ENSG00000171786	NHLH1
ENSG00000066294	CD84
ENSG00000122224	LY9
ENSG00000158773	USF1
ENSG00000158887	MPZ
ENSG00000203747	FCGR3A
ENSG00000162747	FCGR3B
ENSG00000198771	RCSD1
ENSG00000197965	MPZL1
ENSG00000198734	F5
ENSG00000171806	METTL18
ENSG00000000457	SCYL3
ENSG00000120370	GORAB
ENSG00000117523	PRRC2C
ENSG00000283683	MYOCOS
ENSG00000235750	KIAA0040
ENSG00000227740	LINC02803
ENSG00000143322	ABL2
ENSG00000231966	NA
ENSG00000169905	TOR1AIP2
ENSG00000135823	STX6
ENSG00000135838	NPL
ENSG00000232860	SMG7-AS1
ENSG00000116698	SMG7
ENSG00000116701	NCF2
ENSG00000162704	ARPC5
ENSG00000198756	COLGALT2
ENSG00000000971	CFH
ENSG00000177888	ZBTB41
ENSG00000163431	LMOD1
ENSG00000133063	CHIT1
ENSG00000233791	BTG2-DT
ENSG00000163545	NUAK2
ENSG00000285417	NA
ENSG00000162894	FCMR
ENSG00000123836	PFKFB2
ENSG00000203709	NA
ENSG00000009790	TRAF3IP3
ENSG00000082512	TRAF5
ENSG00000174606	ANGEL2
ENSG00000143499	SMYD2
ENSG00000228063	LYPLAL1-DT
ENSG00000136628	EPRS1
ENSG00000162909	CAPN2
ENSG00000163041	H3-3A
ENSG00000236975	NA
ENSG00000237481	NA
ENSG00000135775	COG2
ENSG00000182118	FAM89A
ENSG00000116991	SIPA1L2
ENSG00000059588	TARBP1
ENSG00000116977	LGALS8
ENSG00000233355	CHRM3-AS2
ENSG00000162843	WDR64
ENSG00000288723	NA
ENSG00000231512	NA
ENSG00000179456	ZBTB18
ENSG00000015171	ZMYND11
ENSG00000047056	WDR37
ENSG00000226647	NA
ENSG00000287277	NA
ENSG00000151657	KIN
ENSG00000151461	UPF2
ENSG00000181192	DHTKD1
ENSG00000228302	NA
ENSG00000086475	SEPHS1
ENSG00000185267	CDNF
ENSG00000287925	NA
ENSG00000148483	TMEM236
ENSG00000286924	NA
ENSG00000148450	MSRB2
ENSG00000099246	RAB18
ENSG00000095787	WAC
ENSG00000107968	MAP3K8
ENSG00000150093	ITGB1
ENSG00000108100	CCNY
ENSG00000165733	BMS1
ENSG00000198915	RASGEF1A
ENSG00000165512	ZNF22
ENSG00000012779	ALOX5
ENSG00000172661	WASHC2C
ENSG00000099290	WASHC2A
ENSG00000204147	ASAH2B
ENSG00000148572	NRBF2
ENSG00000096746	HNRNPH3
ENSG00000107625	DDX50
ENSG00000165732	DDX21
ENSG00000156502	SUPV3L1
ENSG00000156521	TYSND1
ENSG00000148719	DNAJB12
ENSG00000138315	OIT3
ENSG00000185009	AP3M1
ENSG00000156650	KAT6B
ENSG00000165637	VDAC2
ENSG00000178217	SH2D4B
ENSG00000152766	ANKRD22
ENSG00000107798	LIPA
ENSG00000138182	KIF20B
ENSG00000138119	MYOF
ENSG00000173145	NOC3L
ENSG00000119977	TCTN3
ENSG00000237169	NA
ENSG00000231970	NA
ENSG00000166024	R3HCC1L
ENSG00000120053	GOT1
ENSG00000224934	NA
ENSG00000107566	ERLIN1
ENSG00000236308	NA
ENSG00000107833	NPM3
ENSG00000148840	PPRC1
ENSG00000138111	MFSD13A
ENSG00000156398	SFXN2
ENSG00000148835	TAF5
ENSG00000234699	NA
ENSG00000107957	SH3PXD2A
ENSG00000065621	GSTO2
ENSG00000148700	ADD3
ENSG00000150593	PDCD4
ENSG00000119927	GPAM
ENSG00000023041	ZDHHC6
ENSG00000165806	CASP7
ENSG00000196865	NHLRC2
ENSG00000151553	FHIP2A
ENSG00000119979	DENND10
ENSG00000151929	BAG3
ENSG00000120008	WDR11
ENSG00000066468	FGFR2
ENSG00000107672	NSMCE4A
ENSG00000255624	C10orf88B
ENSG00000179988	PSTK
ENSG00000196177	ACADSB
ENSG00000182022	CHST15
ENSG00000280953	LINC01163
ENSG00000283141	NA
ENSG00000254468	NA
ENSG00000185627	PSMD13
ENSG00000174885	NLRP6
ENSG00000142089	IFITM3
ENSG00000161328	LRRC56
ENSG00000287935	NA
ENSG00000184545	DUSP8
ENSG00000130598	TNNI2
ENSG00000196778	OR52K1
ENSG00000051009	FHIP1B
ENSG00000166313	APBB1
ENSG00000149054	ZNF215
ENSG00000130413	STK33
ENSG00000254554	NA
ENSG00000050165	DKK3
ENSG00000148925	BTBD10
ENSG00000254946	LINC02751
ENSG00000109854	HTATIP2
ENSG00000246225	NA
ENSG00000152219	ARL14EP
ENSG00000148950	IMMP1L
ENSG00000186714	CCDC73
ENSG00000135378	PRRG4
ENSG00000255202	NA
ENSG00000085063	CD59
ENSG00000135363	LMO2
ENSG00000285751	NA
ENSG00000121671	CRY2
ENSG00000135365	PHF21A
ENSG00000066336	SPI1
ENSG00000109919	MTCH2
ENSG00000149115	TNKS1BP1
ENSG00000134809	TIMM10
ENSG00000156587	UBE2L6
ENSG00000166801	FAM111A
ENSG00000255355	NA
ENSG00000285231	OOSP3
ENSG00000110077	MS4A6A
ENSG00000110448	CD5
ENSG00000167996	FTH1
ENSG00000185475	TMEM179B
ENSG00000133321	PLAAT4
ENSG00000133318	RTN3
ENSG00000168005	SPINDOC
ENSG00000072518	MARK2
ENSG00000173511	VEGFB
ENSG00000173264	GPR137
ENSG00000068976	PYGM
ENSG00000229719	NA
ENSG00000168070	MAJIN
ENSG00000168062	BATF2
ENSG00000162241	SLC25A45
ENSG00000168056	LTBP3
ENSG00000254470	AP5B1
ENSG00000172757	CFL1
ENSG00000175294	CATSPER1
ENSG00000173621	LRFN4
ENSG00000173120	KDM2A
ENSG00000172508	CARNS1
ENSG00000160172	FAM86C2P
ENSG00000162337	LRP5
ENSG00000110075	PPP6R3
ENSG00000254682	NA
ENSG00000175591	P2RY2
ENSG00000175575	PAAF1
ENSG00000255847	NA
ENSG00000165434	PGM2L1
ENSG00000166439	RNF169
ENSG00000179240	GVQW3
ENSG00000149269	PAK1
ENSG00000171204	TMEM126B
ENSG00000255005	NA
ENSG00000166002	SMCO4
ENSG00000256469	NA
ENSG00000186280	KDM4D
ENSG00000077458	FAM76B
ENSG00000166037	CEP57
ENSG00000235505	CASP4LP
ENSG00000170903	MSANTD4
ENSG00000149308	NPAT
ENSG00000137713	PPP2R1B
ENSG00000255129	NA
ENSG00000110324	IL10RA
ENSG00000149575	SCN2B
ENSG00000186174	BCL9L
ENSG00000110395	CBL
ENSG00000137642	SORL1
ENSG00000286044	NA
ENSG00000110060	PUS3
ENSG00000280832	NA
ENSG00000257271	NA
ENSG00000273415	NA
ENSG00000134954	ETS1
ENSG00000120451	SNX19
ENSG00000151503	NCAPD3
ENSG00000151065	DCP1B
ENSG00000111321	LTBR
ENSG00000256433	NA
ENSG00000139192	TAPBPL
ENSG00000111640	GAPDH
ENSG00000247853	NA
ENSG00000111653	ING4
ENSG00000089692	LAG3
ENSG00000177575	CD163
ENSG00000166523	CLEC4E
ENSG00000245105	A2M-AS1
ENSG00000175899	A2M
ENSG00000214826	NA
ENSG00000069493	CLEC2D
ENSG00000184293	CLECL1P
ENSG00000256803	LOC102724020
ENSG00000134539	KLRD1
ENSG00000256667	NA
ENSG00000111196	MAGOHB
ENSG00000139083	ETV6
ENSG00000111269	CREBL2
ENSG00000183150	GPR19
ENSG00000214772	NA
ENSG00000111726	CMAS
ENSG00000139163	ETNK1
ENSG00000118307	DNAI7
ENSG00000123095	BHLHE41
ENSG00000064102	INTS13
ENSG00000087448	KLHL42
ENSG00000064763	FAR2
ENSG00000139160	ETFBKMT
ENSG00000174718	RESF1
ENSG00000087470	DNM1L
ENSG00000256538	NA
ENSG00000175548	ALG10B
ENSG00000139116	KIF21A
ENSG00000180116	C12orf40
ENSG00000225342	NA
ENSG00000198001	IRAK4
ENSG00000258181	NA
ENSG00000257924	NA
ENSG00000257906	NA
ENSG00000111424	VDR
ENSG00000167548	KMT2D
ENSG00000258017	NA
ENSG00000167552	TUBA1A
ENSG00000258101	NA
ENSG00000161813	LARP4
ENSG00000183283	DAZAP2
ENSG00000110934	BIN2
ENSG00000123358	NR4A1
ENSG00000139631	CSAD
ENSG00000139651	ZNF740
ENSG00000185591	SP1
ENSG00000135424	ITGA7
ENSG00000258056	CD63-AS1
ENSG00000258317	NA
ENSG00000181852	RNF41
ENSG00000076108	BAZ2A
ENSG00000166886	NAB2
ENSG00000182199	SHMT2
ENSG00000287200	LOC124902947
ENSG00000135407	AVIL
ENSG00000135655	USP15
ENSG00000183735	TBK1
ENSG00000127311	HELB
ENSG00000111530	CAND1
ENSG00000111537	IFNG
ENSG00000166268	MYRFL
ENSG00000139291	TMEM19
ENSG00000139289	PHLDA1
ENSG00000187109	NAP1L1
ENSG00000091039	OSBPL8
ENSG00000258048	NA
ENSG00000277851	NA
ENSG00000187510	PLEKHG7
ENSG00000198015	MRPL42
ENSG00000136040	PLXNC1
ENSG00000111142	METAP2
ENSG00000111144	LTA4H
ENSG00000120800	UTP20
ENSG00000179088	C12orf42
ENSG00000136052	SLC41A2
ENSG00000151135	TMEM263
ENSG00000136045	PWP1
ENSG00000110876	SELPLG
ENSG00000076248	UNG
ENSG00000151148	UBE3B
ENSG00000139436	GIT2
ENSG00000174437	ATP2A2
ENSG00000111271	ACAD10
ENSG00000179295	PTPN11
ENSG00000258102	MAP1LC3B2
ENSG00000135108	FBXO21
ENSG00000176871	WSB2
ENSG00000111725	PRKAB1
ENSG00000089159	PXN
ENSG00000110931	CAMKK2
ENSG00000139714	MORN3
ENSG00000130779	CLIP1
ENSG00000130783	CCDC62
ENSG00000130921	MTRFR
ENSG00000150977	RILPL2
ENSG00000184209	SNRNP35
ENSG00000168778	TCTN2
ENSG00000151948	GLT1D1
ENSG00000185163	DDX51
ENSG00000198393	ZNF26
ENSG00000198040	ZNF84
ENSG00000132953	XPO4
ENSG00000102678	FGF9
ENSG00000276476	LINC00540
ENSG00000132964	CDK8
ENSG00000152484	USP12
ENSG00000139517	LNX2
ENSG00000139514	SLC7A1
ENSG00000122043	NA
ENSG00000232117	NA
ENSG00000133116	KL
ENSG00000133111	RFXAP
ENSG00000120697	ALG5
ENSG00000120699	EXOSC8
ENSG00000223685	LINC00571
ENSG00000120686	UFM1
ENSG00000023516	AKAP11
ENSG00000283554	LINC02341
ENSG00000136146	MED4
ENSG00000136156	ITM2B
ENSG00000136147	PHF11
ENSG00000136144	RCBTB1
ENSG00000152213	ARL11
ENSG00000231856	NA
ENSG00000197168	NEK5
ENSG00000165416	SUGT1
ENSG00000136122	BORA
ENSG00000102554	KLF5
ENSG00000102794	ACOD1
ENSG00000225579	NA
ENSG00000227354	RBM26-AS1
ENSG00000215417	MIR17HG
ENSG00000139793	MBNL2
ENSG00000125245	GPR18
ENSG00000169508	GPR183
ENSG00000280734	NA
ENSG00000134900	TPP2
ENSG00000151287	TEX30
ENSG00000283384	NA
ENSG00000232814	COL4A2-AS1
ENSG00000139832	RAB20
ENSG00000153495	TEX29
ENSG00000153531	ADPRHL1
ENSG00000198824	CHAMP1
ENSG00000129566	TEP1
ENSG00000100823	APEX1
ENSG00000092199	HNRNPC
ENSG00000092203	TOX4
ENSG00000165821	SALL2
ENSG00000211776	TRAV2
ENSG00000211779	TRAV5
ENSG00000211780	TRAV6
ENSG00000211785	TRAV12-1
ENSG00000211792	TRAV14DV4
ENSG00000211799	TRAV19
ENSG00000211803	TRAV23DV6
ENSG00000211810	TRAV29DV5
ENSG00000211812	TRAV26-2
ENSG00000211817	TRAV38-2DV8
ENSG00000211829	NA
ENSG00000197324	LRP10
ENSG00000100461	RBM23
ENSG00000257285	PRMT5-DT
ENSG00000100813	ACIN1
ENSG00000092010	PSME1
ENSG00000139908	TSSK4
ENSG00000100938	GMPR2
ENSG00000129467	ADCY4
ENSG00000100883	SRP54
ENSG00000100906	NFKBIA
ENSG00000174373	RALGAPA1
ENSG00000151332	MBIP
ENSG00000092208	GEMIN2
ENSG00000251363	NA
ENSG00000198718	TOGARAM1
ENSG00000100442	FKBP3
ENSG00000187790	FANCM
ENSG00000100483	VCPKMT
ENSG00000100485	SOS2
ENSG00000125375	DMAC2L
ENSG00000198513	ATL1
ENSG00000100504	PYGL
ENSG00000258479	NA
ENSG00000261208	NA
ENSG00000087301	TXNDC16
ENSG00000198252	STYX
ENSG00000259049	NA
ENSG00000100523	DDHD1
ENSG00000139946	PELI2
ENSG00000259719	NA
ENSG00000259039	NA
ENSG00000100575	TIMM9
ENSG00000050130	JKAMP
ENSG00000027075	PRKCH
ENSG00000247287	NA
ENSG00000140006	WDR89
ENSG00000089775	ZBTB25
ENSG00000179841	AKAP5
ENSG00000125952	MAX
ENSG00000072415	PALS1
ENSG00000134001	EIF2S1
ENSG00000185650	ZFP36L1
ENSG00000258565	NA
ENSG00000100731	PCNX1
ENSG00000286423	NA
ENSG00000259146	NA
ENSG00000119599	DCAF4
ENSG00000165861	ZFYVE1
ENSG00000258944	NA
ENSG00000133961	NUMB
ENSG00000251393	NA
ENSG00000119661	DNAL1
ENSG00000183379	SYNDIG1L
ENSG00000259005	NA
ENSG00000119682	AREL1
ENSG00000119684	MLH3
ENSG00000119640	ACYP1
ENSG00000013523	ANGEL1
ENSG00000246548	LINC02288
ENSG00000100580	TMED8
ENSG00000151445	VIPAS39
ENSG00000100603	SNW1
ENSG00000211448	DIO2
ENSG00000284959	NA
ENSG00000071537	SEL1L
ENSG00000165521	EML5
ENSG00000015133	CCDC88C
ENSG00000100600	LGMN
ENSG00000100605	ITPK1
ENSG00000165949	IFI27
ENSG00000119698	PPP4R4
ENSG00000246223	LINC01550
ENSG00000259097	NA
ENSG00000205476	CCDC85C
ENSG00000247970	NA
ENSG00000140153	WDR20
ENSG00000075413	MARK3
ENSG00000166166	TRMT61A
ENSG00000166428	PLD4
ENSG00000211896	IGHG1
ENSG00000211897	IGHG3
ENSG00000211947	IGHV3-21
ENSG00000211949	IGHV3-23
ENSG00000211956	IGHV4-34
ENSG00000211966	IGHV5-51
ENSG00000224650	IGHV3-74
ENSG00000275835	TUBGCP5
ENSG00000179455	MKRN3
ENSG00000261377	NA
ENSG00000259448	NA
ENSG00000134152	KATNBL1
ENSG00000182117	NOP10
ENSG00000259225	LINC02345
ENSG00000166068	SPRED1
ENSG00000172575	RASGRP1
ENSG00000140320	BAHD1
ENSG00000245849	RAD51-AS1
ENSG00000137824	RMDN3
ENSG00000092531	SNAP23
ENSG00000159433	STARD9
ENSG00000104177	MYEF2
ENSG00000244879	NA
ENSG00000092439	TRPM7
ENSG00000140280	LYSMD2
ENSG00000069966	GNB5
ENSG00000259577	NA
ENSG00000128989	ARPP19
ENSG00000185088	RPS27L
ENSG00000259268	NA
ENSG00000028528	SNX1
ENSG00000074696	HACD3
ENSG00000138614	INTS14
ENSG00000166938	DIS3L
ENSG00000174442	ZWILCH
ENSG00000189227	C15orf61
ENSG00000260898	ADPGK-AS1
ENSG00000261801	LOXL1-AS1
ENSG00000129038	LOXL1
ENSG00000067221	STOML1
ENSG00000178802	MPI
ENSG00000198794	SCAMP5
ENSG00000287926	NA
ENSG00000177971	IMP3
ENSG00000167196	FBXO22
ENSG00000117906	RCN2
ENSG00000140382	HMG20A
ENSG00000259548	NA
ENSG00000176371	ZSCAN2
ENSG00000140612	SEC11A
ENSG00000285667	NA
ENSG00000218052	ADAMTS7P4
ENSG00000172183	ISG20
ENSG00000182054	IDH2
ENSG00000197299	BLM
ENSG00000258725	PRC1-AS1
ENSG00000140450	ARRDC4
ENSG00000283597	FAM169BP
ENSG00000259182	NA
ENSG00000185418	TARS3
ENSG00000007392	LUC7L
ENSG00000127585	FBXL16
ENSG00000103260	METRN
ENSG00000196557	CACNA1H
ENSG00000162066	AMDHD2
ENSG00000008516	MMP25
ENSG00000008517	IL32
ENSG00000167984	NLRC3
ENSG00000213918	DNASE1
ENSG00000126602	TRAP1
ENSG00000103415	HMOX2
ENSG00000168096	ANKS3
ENSG00000184857	TMEM186
ENSG00000166669	ATF7IP2
ENSG00000179583	CIITA
ENSG00000189067	LITAF
ENSG00000048462	TNFRSF17
ENSG00000085721	RRN3
ENSG00000248124	NA
ENSG00000140740	UQCRC2
ENSG00000058600	POLR3E
ENSG00000286808	NA
ENSG00000155592	ZKSCAN2
ENSG00000245888	NSMCE1-DT
ENSG00000077238	IL4R
ENSG00000197272	IL27
ENSG00000149929	HIRIP3
ENSG00000102882	MAPK3
ENSG00000179965	ZNF771
ENSG00000099377	HSD3B7
ENSG00000260911	NA
ENSG00000169896	ITGAM
ENSG00000140795	MYLK3
ENSG00000155330	C16orf87
ENSG00000205423	CNEP1R1
ENSG00000224578	HNRNPA1L3
ENSG00000245694	CRNDE
ENSG00000198848	CES1
ENSG00000102900	NUP93
ENSG00000172775	PSME3IP1
ENSG00000182885	ADGRG3
ENSG00000260927	LOC101927556
ENSG00000103037	SETD6
ENSG00000140932	CMTM2
ENSG00000237172	B3GNT9
ENSG00000140939	NOL3
ENSG00000196155	PLEKHG4
ENSG00000159720	ATP6V0D1
ENSG00000159753	CARMIL2
ENSG00000102904	TSNAXIP1
ENSG00000262136	NA
ENSG00000285710	NA
ENSG00000157350	ST3GAL2
ENSG00000180917	CMTR2
ENSG00000140830	TXNL4B
ENSG00000257017	HP
ENSG00000184517	ZFP1
ENSG00000065427	KARS1
ENSG00000135698	MPHOSPH6
ENSG00000103187	COTL1
ENSG00000153786	ZDHHC7
ENSG00000135709	KIAA0513
ENSG00000051523	CYBA
ENSG00000260630	SNAI3-AS1
ENSG00000141012	GALNS
ENSG00000205018	NA
ENSG00000158792	SPATA2L
ENSG00000075399	VPS9D1
ENSG00000141013	GAS8
ENSG00000141252	VPS53
ENSG00000179409	GEMIN4
ENSG00000167193	CRK
ENSG00000174238	PITPNA
ENSG00000132383	RPA1
ENSG00000108963	DPH1
ENSG00000177374	HIC1
ENSG00000185722	ANKFY1
ENSG00000132382	MYBBP1A
ENSG00000141456	PELP1
ENSG00000261898	NA
ENSG00000141497	ZMYND15
ENSG00000129250	KIF1C
ENSG00000029725	RABEP1
ENSG00000262943	ALOX12P2
ENSG00000040633	PHF23
ENSG00000167874	TMEM88
ENSG00000178921	PFAS
ENSG00000166579	NDEL1
ENSG00000141506	PIK3R5
ENSG00000109047	RCVRN
ENSG00000241185	NA
ENSG00000166582	CENPV
ENSG00000197566	ZNF624
ENSG00000141030	COPS3
ENSG00000176994	SMCR8
ENSG00000176974	SHMT1
ENSG00000171916	LGALS9C
ENSG00000154016	GRAP
ENSG00000124422	USP22
ENSG00000266313	NA
ENSG00000076604	TRAF4
ENSG00000173065	FAM222B
ENSG00000132589	FLOT2
ENSG00000265845	LOC101927018
ENSG00000108256	NUFIP2
ENSG00000108582	CPD
ENSG00000126861	OMG
ENSG00000267364	NA
ENSG00000154760	SLFN13
ENSG00000277089	NA
ENSG00000274767	NA
ENSG00000276070	CCL4L2
ENSG00000275532	NA
ENSG00000167258	CDK12
ENSG00000171475	WIPF2
ENSG00000131759	RARA
ENSG00000167920	KRT10-AS1
ENSG00000108797	CNTNAP1
ENSG00000131471	AOC3
ENSG00000068079	IFI35
ENSG00000184988	TMEM106A
ENSG00000231256	CFAP97D1
ENSG00000267394	NA
ENSG00000108309	RUNDC3A
ENSG00000108424	KPNB1
ENSG00000141295	SCRN2
ENSG00000167182	SP2
ENSG00000272763	NA
ENSG00000244649	NA
ENSG00000136436	CALCOCO2
ENSG00000159202	UBE2Z
ENSG00000230532	NA
ENSG00000250751	NA
ENSG00000154945	ANKRD40
ENSG00000153933	DGKE
ENSG00000121057	AKAP1
ENSG00000265542	NA
ENSG00000005379	TSPOAP1
ENSG00000264672	SEPTIN4-AS1
ENSG00000108387	SEPTIN4
ENSG00000167434	CA4
ENSG00000263887	NA
ENSG00000271605	MILR1
ENSG00000258890	CEP95
ENSG00000120063	GNA13
ENSG00000154240	CEP112
ENSG00000108950	FAM20A
ENSG00000267461	NA
ENSG00000267659	LINC01482
ENSG00000154265	ABCA5
ENSG00000171595	DNAI2
ENSG00000167851	CD300A
ENSG00000284690	CD300H
ENSG00000204345	CD300LD
ENSG00000264659	NA
ENSG00000125449	ARMC7
ENSG00000073350	LLGL2
ENSG00000132470	ITGB4
ENSG00000132475	H3-3B
ENSG00000141569	TRIM65
ENSG00000161533	ACOX1
ENSG00000161547	SRSF2
ENSG00000167895	TMC8
ENSG00000267737	NA
ENSG00000184557	SOCS3
ENSG00000266970	SOCS3-DT
ENSG00000267123	SCAT1
ENSG00000055483	USP36
ENSG00000171302	CANT1
ENSG00000169696	ASPSCR1
ENSG00000169727	GPS1
ENSG00000141551	CSNK1D
ENSG00000141580	WDR45B
ENSG00000101557	USP14
ENSG00000079134	THOC1
ENSG00000132199	ENOSF1
ENSG00000080986	NDC80
ENSG00000132205	EMILIN2
ENSG00000118680	MYL12B
ENSG00000263753	LINC00667
ENSG00000287065	NA
ENSG00000141401	IMPA2
ENSG00000101654	RNMT
ENSG00000175322	ZNF519
ENSG00000141380	SS18
ENSG00000141434	MEP1B
ENSG00000141424	SLC39A6
ENSG00000150477	KIAA1328
ENSG00000288545	NA
ENSG00000101638	ST8SIA5
ENSG00000266957	NA
ENSG00000267322	SCARNA17
ENSG00000082212	ME2
ENSG00000176624	MEX3C
ENSG00000166845	C18orf54
ENSG00000166510	CCDC68
ENSG00000166562	SEC11C
ENSG00000119537	KDSR
ENSG00000150637	CD226
ENSG00000060069	CTDP1
ENSG00000267780	NA
ENSG00000178342	KCNG2
ENSG00000281379	NA
ENSG00000070423	RNF126
ENSG00000175221	MED16
ENSG00000064666	CNN2
ENSG00000064932	SBNO2
ENSG00000130005	GAMT
ENSG00000129968	ABHD17A
ENSG00000172081	MOB3A
ENSG00000167476	JSRP1
ENSG00000172009	THOP1
ENSG00000104964	TLE5
ENSG00000007264	MATK
ENSG00000167676	PLIN4
ENSG00000167680	SEMA6B
ENSG00000105355	PLIN3
ENSG00000127663	KDM4B
ENSG00000160633	SAFB
ENSG00000196365	LONP1
ENSG00000267571	NA
ENSG00000105519	CAPS
ENSG00000125648	SLC25A23
ENSG00000125726	CD70
ENSG00000125731	SH2D3A
ENSG00000141968	VAV1
ENSG00000183019	MCEMP1
ENSG00000142347	MYO1F
ENSG00000181143	MUC16
ENSG00000174652	ZNF266
ENSG00000105088	OLFM2
ENSG00000090339	ICAM1
ENSG00000076662	ICAM3
ENSG00000180739	S1PR5
ENSG00000129351	ILF3
ENSG00000130158	DOCK6
ENSG00000234773	NA
ENSG00000123144	TRIR
ENSG00000037757	MRI1
ENSG00000104998	IL27RA
ENSG00000072062	PRKACA
ENSG00000123159	GIPC1
ENSG00000105135	ILVBL
ENSG00000267241	NA
ENSG00000167461	RAB8A
ENSG00000269720	CCDC194
ENSG00000248099	INSL3
ENSG00000105639	JAK3
ENSG00000269145	NA
ENSG00000184162	NR2C2AP
ENSG00000256771	ZNF253
ENSG00000197124	ZNF682
ENSG00000196705	ZNF431
ENSG00000182141	ZNF708
ENSG00000197134	ZNF257
ENSG00000196172	ZNF681
ENSG00000267240	NA
ENSG00000076650	GPATCH1
ENSG00000153885	KCTD15
ENSG00000126261	UBA2
ENSG00000197841	ZNF181
ENSG00000271109	NA
ENSG00000089351	GRAMD1A
ENSG00000105711	SCN1B
ENSG00000105707	HPN
ENSG00000233214	NA
ENSG00000232680	NA
ENSG00000126262	FFAR2
ENSG00000249115	HAUS5
ENSG00000011590	ZBTB32
ENSG00000126243	LRFN3
ENSG00000167635	ZNF146
ENSG00000142065	ZFP14
ENSG00000181007	ZFP82
ENSG00000254004	ZNF260
ENSG00000186020	ZNF529
ENSG00000189042	ZNF567
ENSG00000267041	ZNF850
ENSG00000185869	ZNF829
ENSG00000198453	ZNF568
ENSG00000267345	LOC105372390
ENSG00000188283	ZNF383
ENSG00000189164	ZNF527
ENSG00000171827	ZNF570
ENSG00000180479	ZNF571
ENSG00000267152	NA
ENSG00000167642	SPINT2
ENSG00000104814	MAP4K1
ENSG00000128000	ZNF780B
ENSG00000105245	NUMBL
ENSG00000167601	AXL
ENSG00000105352	CEACAM4
ENSG00000268833	NA
ENSG00000170956	CEACAM3
ENSG00000160570	DEDD2
ENSG00000231412	NA
ENSG00000204936	CD177
ENSG00000204933	NA
ENSG00000176531	PHLDB3
ENSG00000104783	KCNN4
ENSG00000167637	ZNF283
ENSG00000263002	ZNF234
ENSG00000131115	ZNF227
ENSG00000187244	BCAM
ENSG00000170684	ZNF296
ENSG00000012061	ERCC1
ENSG00000125740	FOSB
ENSG00000142230	SAE1
ENSG00000134815	DHX34
ENSG00000105479	ODAD1
ENSG00000287603	NA
ENSG00000105516	DBP
ENSG00000105552	BCAT2
ENSG00000104812	GYS1
ENSG00000142552	RCN3
ENSG00000142546	NOSIP
ENSG00000129450	SIGLEC9
ENSG00000255441	NA
ENSG00000105492	SIGLEC6
ENSG00000198093	ZNF649
ENSG00000197619	ZNF615
ENSG00000142556	ZNF614
ENSG00000123870	NA
ENSG00000130844	ZNF331
ENSG00000142405	NLRP12
ENSG00000088038	CNOT3
ENSG00000167608	TMC4
ENSG00000105609	LILRB5
ENSG00000234436	NA
ENSG00000133265	HSPBP1
ENSG00000197016	ZNF470
ENSG00000251369	ZNF550
ENSG00000083817	ZNF416
ENSG00000183647	ZNF530
ENSG00000083828	ZNF586
ENSG00000178935	ZNF552
ENSG00000270804	NA
ENSG00000151353	TMEM18
ENSG00000229727	LOC100506274
ENSG00000134313	KIDINS220
ENSG00000143797	MBOAT2
ENSG00000151693	ASAP2
ENSG00000134330	IAH1
ENSG00000134308	YWHAQ
ENSG00000079785	DDX1
ENSG00000197872	CYRIA
ENSG00000228784	LINC00954
ENSG00000143869	GDF7
ENSG00000163026	WDCP
ENSG00000115129	TP53I3
ENSG00000286707	NA
ENSG00000138073	PREB
ENSG00000163803	PLB1
ENSG00000115295	CLIP4
ENSG00000285984	NA
ENSG00000091106	NLRC4
ENSG00000119820	YIPF4
ENSG00000115816	CEBPZ
ENSG00000235848	NA
ENSG00000138061	CYP1B1
ENSG00000227292	NA
ENSG00000287255	LOC101929667
ENSG00000205054	LINC01121
ENSG00000119729	RHOQ
ENSG00000151665	PIGF
ENSG00000180398	MCFD2
ENSG00000143942	CHAC2
ENSG00000068912	ERLEC1
ENSG00000138035	PNPT1
ENSG00000197329	PELI1
ENSG00000138069	RAB1A
ENSG00000236780	LINC01829
ENSG00000115956	PLEK
ENSG00000163219	ARHGAP25
ENSG00000198380	GFPT1
ENSG00000135636	DYSF
ENSG00000116096	SPR
ENSG00000124356	STAMBP
ENSG00000005448	WDR54
ENSG00000114993	RTKN
ENSG00000135622	SEMA4F
ENSG00000005436	GCFC2
ENSG00000287625	NA
ENSG00000176407	KCMF1
ENSG00000168899	VAMP5
ENSG00000168894	RNF181
ENSG00000132313	MRPL35
ENSG00000233673	ANAPC1P1
ENSG00000243466	IGKV1-5
ENSG00000240671	IGKV1-8
ENSG00000241755	IGKV1-9
ENSG00000244575	IGKV1-27
ENSG00000172005	MAL
ENSG00000174501	ANKRD36C
ENSG00000231584	NA
ENSG00000158050	DUSP2
ENSG00000168758	SEMA4C
ENSG00000230606	NA
ENSG00000135940	COX5B
ENSG00000115073	ACTR1B
ENSG00000115085	ZAP70
ENSG00000226791	LINC02611
ENSG00000135951	TSGA10
ENSG00000115526	CHST10
ENSG00000158435	CNOT11
ENSG00000071054	MAP4K4
ENSG00000115594	IL1R1
ENSG00000135968	GCC2
ENSG00000144061	NPHP1
ENSG00000144161	ZC3H8
ENSG00000136689	IL1RN
ENSG00000228857	NA
ENSG00000019169	MARCO
ENSG00000115107	STEAP3
ENSG00000224789	NA
ENSG00000144118	RALB
ENSG00000235840	NA
ENSG00000169994	MYO7B
ENSG00000152082	MZT2B
ENSG00000136002	ARHGEF4
ENSG00000115866	DARS1
ENSG00000115919	KYNU
ENSG00000168280	KIF5C
ENSG00000168288	MMADHC
ENSG00000231969	MMADHC-DT
ENSG00000123609	NMI
ENSG00000080345	RIF1
ENSG00000162980	ARL5A
ENSG00000227403	LINC01806
ENSG00000078098	FAP
ENSG00000184611	KCNH7
ENSG00000169432	SCN9A
ENSG00000136546	SCN7A
ENSG00000138399	FASTKD1
ENSG00000115806	GORASP2
ENSG00000115827	DCAF17
ENSG00000232788	ITGA6-AS1
ENSG00000152256	PDK1
ENSG00000091428	RAPGEF4
ENSG00000144354	CDCA7
ENSG00000144306	SCRN3
ENSG00000079156	OSBPL6
ENSG00000223960	CHROMR
ENSG00000180228	PRKRA
ENSG00000163492	CCDC141
ENSG00000187231	SESTD1
ENSG00000272800	NA
ENSG00000286797	NA
ENSG00000188738	FSIP2
ENSG00000128694	OSGEPL1
ENSG00000189362	NEMP2
ENSG00000138378	STAT4
ENSG00000223466	LOC124908063
ENSG00000119041	GTF3C3
ENSG00000162944	RFTN2
ENSG00000224672	NA
ENSG00000138443	ABI2
ENSG00000118257	NRP2
ENSG00000204186	ZDBF2
ENSG00000115020	PIKFYVE
ENSG00000197713	RPE
ENSG00000229127	NA
ENSG00000163466	ARPC2
ENSG00000225062	CATIP-AS1
ENSG00000018280	SLC11A1
ENSG00000144580	CNOT9
ENSG00000074582	BCS1L
ENSG00000124003	MOGAT1
ENSG00000081052	COL4A4
ENSG00000135899	SP110
ENSG00000079263	SP140
ENSG00000135916	ITM2C
ENSG00000135898	GPR55
ENSG00000171596	NMUR1
ENSG00000135930	EIF4E2
ENSG00000231682	LINC01891
ENSG00000198612	COPS8
ENSG00000144488	ESPNL
ENSG00000132326	PER2
ENSG00000226321	CROCC2
ENSG00000122085	MTERF4
ENSG00000115687	PASK
ENSG00000168393	DTYMK
ENSG00000168395	ING5
ENSG00000125826	RBCK1
ENSG00000125875	TBC1D20
ENSG00000101298	SNPH
ENSG00000276649	NA
ENSG00000198053	SIRPA
ENSG00000233896	PDYN-AS1
ENSG00000215305	VPS16
ENSG00000101224	CDC25B
ENSG00000101236	RNF24
ENSG00000101290	CDS2
ENSG00000125868	DSTN
ENSG00000173418	NAA20
ENSG00000188559	RALGAPA2
ENSG00000230492	LOC101929707
ENSG00000077984	CST7
ENSG00000154930	ACSS1
ENSG00000100994	PYGB
ENSG00000130684	ZNF337
ENSG00000149531	NA
ENSG00000226239	NA
ENSG00000101336	HCK
ENSG00000101346	POFUT1
ENSG00000101350	KIF3B
ENSG00000131069	ACSS2
ENSG00000101347	SAMHD1
ENSG00000118705	RPN2
ENSG00000198900	TOP1
ENSG00000226648	PLCG1-AS1
ENSG00000101052	IFT52
ENSG00000124102	PI3
ENSG00000124107	SLPI
ENSG00000101457	DNTTIP1
ENSG00000064601	CTSA
ENSG00000124151	NCOA3
ENSG00000124207	CSE1L
ENSG00000124201	ZNFX1
ENSG00000158470	B4GALT5
ENSG00000224397	PELATON
ENSG00000203999	LINC01270
ENSG00000054793	ATP9A
ENSG00000101132	PFDN4
ENSG00000022277	RTF2
ENSG00000124224	NA
ENSG00000124164	VAPB
ENSG00000101160	CTSZ
ENSG00000124203	ZNF831
ENSG00000273812	NA
ENSG00000167046	NA
ENSG00000060491	OGFR
ENSG00000101194	SLC17A9
ENSG00000197457	STMN3
ENSG00000125520	SLC2A4RG
ENSG00000101150	TPD52L2
ENSG00000196700	ZNF512B
ENSG00000130590	SAMD10
ENSG00000155307	SAMSN1
ENSG00000154640	BTG3
ENSG00000222042	NA
ENSG00000234883	MIR155HG
ENSG00000159086	PAXBP1
ENSG00000205930	NA
ENSG00000223799	NA
ENSG00000243646	IL10RB
ENSG00000159128	IFNGR2
ENSG00000237945	LINC00649
ENSG00000159259	CHAF1B
ENSG00000185808	PIGP
ENSG00000157540	DYRK1A
ENSG00000183527	PSMG1
ENSG00000177398	UMODL1
ENSG00000160185	UBASH3A
ENSG00000160191	PDE9A
ENSG00000160214	RRP1
ENSG00000183255	PTTG1IP
ENSG00000173638	SLC19A1
ENSG00000286082	NA
ENSG00000142173	COL6A2
ENSG00000236754	LOC101929372
ENSG00000131100	ATP6V1E1
ENSG00000241527	CA15P1
ENSG00000099904	ZDHHC8
ENSG00000184436	THAP7
ENSG00000211639	IGLV4-60
ENSG00000211663	IGLV3-19
ENSG00000159496	RGL4
ENSG00000099985	OSM
ENSG00000187860	CCDC157
ENSG00000185339	TCN2
ENSG00000182541	LIMK2
ENSG00000100105	PATZ1
ENSG00000183530	PRR14L
ENSG00000242082	SLC5A4-AS1
ENSG00000233080	LINC01399
ENSG00000128335	APOL2
ENSG00000100342	APOL1
ENSG00000287269	NA
ENSG00000228719	NA
ENSG00000232254	CSF2RBP1
ENSG00000235237	NA
ENSG00000128340	RAC2
ENSG00000100211	CBY1
ENSG00000100335	MIEF1
ENSG00000100346	CACNA1I
ENSG00000100354	TNRC6B
ENSG00000100387	RBX1
ENSG00000100418	DESI1
ENSG00000184208	C22orf46
ENSG00000182057	NA
ENSG00000235568	NFAM1
ENSG00000100300	TSPO
ENSG00000138964	PARVG
ENSG00000188636	RTL6
ENSG00000128165	ADM2
ENSG00000273272	NA
ENSG00000231249	ITPR1-DT
ENSG00000071282	LMCD1
ENSG00000157017	GHRL
ENSG00000132155	RAF1
ENSG00000132182	NUP210
ENSG00000131389	SLC6A6
ENSG00000131379	C3orf20
ENSG00000131368	MRPS25
ENSG00000131378	RFTN1
ENSG00000154822	PLCL2
ENSG00000144566	RAB5A
ENSG00000197885	NKIRAS1
ENSG00000174748	RPL15
ENSG00000174738	NR1D2
ENSG00000163508	EOMES
ENSG00000225548	LINC01980
ENSG00000183813	CCR4
ENSG00000153560	UBP1
ENSG00000279727	LINC02033
ENSG00000187091	PLCD1
ENSG00000060971	ACAA1
ENSG00000114739	ACVR2B
ENSG00000144655	CSRNP1
ENSG00000144659	SLC25A38
ENSG00000011198	ABHD5
ENSG00000178917	ZNF852
ENSG00000186446	ZNF501
ENSG00000163812	ZDHHC3
ENSG00000163814	CDCP1
ENSG00000144791	LIMD1
ENSG00000163820	FYCO1
ENSG00000173578	XCR1
ENSG00000223552	NA
ENSG00000160791	CCR5
ENSG00000121797	CCRL2
ENSG00000163827	LRRC2
ENSG00000236409	NA
ENSG00000181555	SETD2
ENSG00000164054	SHISA5
ENSG00000114316	USP4
ENSG00000173540	GMPPB
ENSG00000176095	IP6K1
ENSG00000230454	NA
ENSG00000012171	SEMA3B
ENSG00000179564	LSMEM2
ENSG00000068028	RASSF1
ENSG00000114388	NPRL2
ENSG00000280382	NA
ENSG00000114738	MAPKAPK3
ENSG00000164082	GRM2
ENSG00000010322	NISCH
ENSG00000163932	PRKCD
ENSG00000286531	NA
ENSG00000174840	PDE12
ENSG00000168297	PXK
ENSG00000224479	NA
ENSG00000163634	THOC7
ENSG00000163635	ATXN7
ENSG00000239653	PSMD6-AS2
ENSG00000163637	PRICKLE2
ENSG00000163376	KBTBD8
ENSG00000163421	PROK2
ENSG00000287131	LOC105377156
ENSG00000244026	FAM86DP
ENSG00000083937	CHMP2B
ENSG00000179021	C3orf38
ENSG00000178694	NSUN3
ENSG00000113966	ARL6
ENSG00000170854	RIOX2
ENSG00000287421	NA
ENSG00000198919	DZIP3
ENSG00000163519	TRAT1
ENSG00000177707	NECTIN3
ENSG00000240891	PLCXD2
ENSG00000144827	ABHD10
ENSG00000174500	GCSAM
ENSG00000144848	ATG3
ENSG00000163607	GTPBP8
ENSG00000163617	CCDC191
ENSG00000151577	DRD3
ENSG00000181847	TIGIT
ENSG00000242290	ZBTB20-AS5
ENSG00000243276	NA
ENSG00000121594	CD80
ENSG00000175697	GPR156
ENSG00000145103	ILDR1
ENSG00000121552	CSTA
ENSG00000160124	MIX23
ENSG00000138496	PARP9
ENSG00000163840	DTX3L
ENSG00000173200	PARP15
ENSG00000173193	PARP14
ENSG00000175455	CCDC14
ENSG00000114520	SNX4
ENSG00000189366	ALG1L1P
ENSG00000114544	SLC41A3
ENSG00000250012	LOC105374085
ENSG00000183624	HMCES
ENSG00000206417	NA
ENSG00000250608	NUDT16-DT
ENSG00000198585	NUDT16
ENSG00000138246	DNAJC13
ENSG00000081307	UBA5
ENSG00000174579	MSL2
ENSG00000175066	GK5
ENSG00000188582	PAQR9
ENSG00000071794	HLTF
ENSG00000181631	P2RY13
ENSG00000243305	NA
ENSG00000174953	DHX36
ENSG00000243969	NA
ENSG00000243629	LINC00880
ENSG00000168779	SHOX2
ENSG00000178053	MLF1
ENSG00000168811	IL12A
ENSG00000114450	GNB4
ENSG00000136522	MRPL47
ENSG00000172578	KLHL6
ENSG00000114859	CLCN2
ENSG00000156931	VPS8
ENSG00000073849	ST6GAL1
ENSG00000233308	OSTN-AS1
ENSG00000127252	PLAAT1
ENSG00000233058	NA
ENSG00000145014	TMEM44
ENSG00000041802	LSG1
ENSG00000163959	SLC51A
ENSG00000161217	PCYT1A
ENSG00000163961	RNF168
ENSG00000232065	NA
ENSG00000180370	PAK2
ENSG00000169026	SLC49A3
ENSG00000185619	PCGF3
ENSG00000127418	FGFRL1
ENSG00000013810	TACC3
ENSG00000109685	NSD2
ENSG00000123933	MXD4
ENSG00000168884	TNIP2
ENSG00000087266	SH3BP2
ENSG00000249673	NA
ENSG00000163956	LRPAP1
ENSG00000145220	LYAR
ENSG00000109501	WFS1
ENSG00000170846	LOC93622
ENSG00000246526	LINC02481
ENSG00000249988	NA
ENSG00000118564	FBXL5
ENSG00000109743	BST1
ENSG00000248138	NA
ENSG00000163257	DCAF16
ENSG00000109618	SEPSECS
ENSG00000169299	PGM2
ENSG00000174123	TLR10
ENSG00000250906	NA
ENSG00000249771	NA
ENSG00000188848	BEND4
ENSG00000151806	GUF1
ENSG00000145246	ATP10D
ENSG00000145247	OCIAD2
ENSG00000109184	DCUN1D4
ENSG00000109220	CHIC2
ENSG00000286599	NA
ENSG00000287382	LOC105377663
ENSG00000128059	PPAT
ENSG00000084093	REST
ENSG00000249763	NA
ENSG00000163626	COX18
ENSG00000169429	CXCL8
ENSG00000169116	PARM1
ENSG00000138755	CXCL9
ENSG00000138750	NUP54
ENSG00000156234	CXCL13
ENSG00000138767	CNOT6L
ENSG00000152795	HNRNPDL
ENSG00000145287	PLAC8
ENSG00000173085	COQ2
ENSG00000173083	HPSE
ENSG00000138678	GPAT3
ENSG00000145332	KLHL8
ENSG00000170509	HSD17B13
ENSG00000170502	NUDT9
ENSG00000163644	PPM1K
ENSG00000185477	GPRIN3
ENSG00000247775	SNCA-AS1
ENSG00000164037	SLC9B1
ENSG00000164039	BDH2
ENSG00000251259	NA
ENSG00000249635	LOC101929577
ENSG00000155016	CYP2U1
ENSG00000138796	HADH
ENSG00000145365	TIFA
ENSG00000138658	ZGRF1
ENSG00000164100	NDST3
ENSG00000150961	SEC24D
ENSG00000164096	C4orf3
ENSG00000164112	SMIM43
ENSG00000181004	BBS12
ENSG00000170917	NUDT6
ENSG00000172007	RAB33B
ENSG00000145391	SETD7
ENSG00000250326	LOC105377623
ENSG00000164163	ABCE1
ENSG00000151611	MMAA
ENSG00000170006	TMEM154
ENSG00000287216	NA
ENSG00000137462	TLR2
ENSG00000249309	NA
ENSG00000164114	MAP9
ENSG00000198498	TMA16
ENSG00000168594	ADAM29
ENSG00000038002	AGA
ENSG00000168564	CDKN2AIP
ENSG00000249173	LINC01093
ENSG00000151729	SLC25A4
ENSG00000164323	CFAP97
ENSG00000109771	LRP2BP
ENSG00000250410	NA
ENSG00000164342	TLR3
ENSG00000180104	EXOC3
ENSG00000171368	TPPP
ENSG00000185986	SDHAP3
ENSG00000164151	ICE1
ENSG00000112941	TENT4A
ENSG00000150756	ATPSCKMT
ENSG00000150753	CCT5
ENSG00000246016	NA
ENSG00000145569	OTULINL
ENSG00000248455	LINC02217
ENSG00000250453	NA
ENSG00000113387	SUB1
ENSG00000286543	LOC124900957
ENSG00000152582	SPEF2
ENSG00000248969	NA
ENSG00000113569	NUP155
ENSG00000132357	CARD6
ENSG00000151876	FBXO4
ENSG00000287263	FLJ32255
ENSG00000172239	PAIP1
ENSG00000112992	NNT
ENSG00000164172	MOCS2
ENSG00000164258	NDUFS4
ENSG00000164509	IL31RA
ENSG00000248727	LINC01948
ENSG00000155545	MIER3
ENSG00000247345	NA
ENSG00000049167	ERCC8
ENSG00000188725	SMIM15
ENSG00000251279	NA
ENSG00000086189	DIMT1
ENSG00000145675	PIK3R1
ENSG00000145740	SLC30A5
ENSG00000152942	RAD17
ENSG00000183474	GTF2H2C
ENSG00000248477	NAIPP3
ENSG00000179978	NA
ENSG00000250687	NA
ENSG00000249437	NAIP
ENSG00000251634	NA
ENSG00000145734	BDP1
ENSG00000131844	MCCC2
ENSG00000113163	CERT1
ENSG00000164309	CMYA5
ENSG00000184188	NA
ENSG00000189127	ANKRD34B
ENSG00000164180	TMEM161B
ENSG00000176055	MBLAC2
ENSG00000164291	ARSK
ENSG00000173221	GLRX
ENSG00000250362	NA
ENSG00000164307	ERAP1
ENSG00000174136	RGMB
ENSG00000164209	SLC25A46
ENSG00000164211	STARD4
ENSG00000172795	DCP2
ENSG00000151304	SRFBP1
ENSG00000164902	PHAX
ENSG00000164241	C5orf63
ENSG00000164244	PRRC1
ENSG00000186687	LYRM7
ENSG00000197208	SLC22A4
ENSG00000238160	NA
ENSG00000125347	IRF1
ENSG00000131437	KIF3A
ENSG00000072364	AFF4
ENSG00000113583	C5orf15
ENSG00000081059	TCF7
ENSG00000248559	NA
ENSG00000237190	CDKN2AIPNL
ENSG00000113648	MACROH2A1
ENSG00000094880	CDC23
ENSG00000120733	KDM3B
ENSG00000170464	DNAJC18
ENSG00000245146	NA
ENSG00000185129	PURA
ENSG00000213523	SRA1
ENSG00000145901	TNIP1
ENSG00000197043	ANXA6
ENSG00000145907	G3BP1
ENSG00000164576	SAP30L
ENSG00000082516	GEMIN5
ENSG00000155858	LSM11
ENSG00000145860	RNF145
ENSG00000113312	TTC1
ENSG00000135083	CCNJL
ENSG00000170584	NUDCD2
ENSG00000040275	SPDL1
ENSG00000043462	LCP2
ENSG00000253736	LOC105377730
ENSG00000120129	DUSP1
ENSG00000164463	CREBRF
ENSG00000113742	CPEB4
ENSG00000185056	C5orf47
ENSG00000164466	SFXN1
ENSG00000113194	FAF2
ENSG00000087206	UIMC1
ENSG00000169223	LMAN2
ENSG00000196923	PDLIM7
ENSG00000146094	DOK3
ENSG00000175309	PHYKPL
ENSG00000177932	ZNF354C
ENSG00000169045	HNRNPH1
ENSG00000161021	MAML1
ENSG00000131446	MGAT1
ENSG00000238035	NA
ENSG00000124535	WRNIP1
ENSG00000021355	SERPINB1
ENSG00000288612	NA
ENSG00000137275	RIPK1
ENSG00000180822	PSMG4
ENSG00000233064	NA
ENSG00000124785	NRN1
ENSG00000111837	MAK
ENSG00000111859	NEDD9
ENSG00000095951	HIVEP1
ENSG00000286281	NA
ENSG00000165097	KDM1B
ENSG00000124532	MRS2
ENSG00000137261	KIAA0319
ENSG00000111802	TDP2
ENSG00000214975	NA
ENSG00000286633	NA
ENSG00000272462	NA
ENSG00000180596	H2BC4
ENSG00000180573	H2AC6
ENSG00000186470	BTN3A2
ENSG00000096654	ZNF184
ENSG00000281706	LINC01012
ENSG00000196812	ZSCAN16
ENSG00000204642	HLA-F
ENSG00000206341	NA
ENSG00000204590	GNL1
ENSG00000146112	PPP1R18
ENSG00000272273	IER3-AS1
ENSG00000206344	HCG27
ENSG00000204444	APOM
ENSG00000213719	CLIC1
ENSG00000204386	NEU1
ENSG00000168394	TAP1
ENSG00000204228	HSD17B8
ENSG00000232940	HCG25
ENSG00000231925	TAPBP
ENSG00000096433	ITPR3
ENSG00000124507	PACSIN1
ENSG00000112039	FANCE
ENSG00000157343	ARMC12
ENSG00000112062	MAPK14
ENSG00000189325	BNIP5
ENSG00000224666	NA
ENSG00000285888	NA
ENSG00000137168	PPIL1
ENSG00000124767	GLO1
ENSG00000112561	TFEB
ENSG00000170734	POLH
ENSG00000112759	SLC29A1
ENSG00000001561	ENPP4
ENSG00000112796	ENPP5
ENSG00000146072	TNFRSF21
ENSG00000031691	CENPQ
ENSG00000096092	TMEM14A
ENSG00000137270	GCM1
ENSG00000112200	ZNF451
ENSG00000226803	NA
ENSG00000146166	LGSN
ENSG00000146243	IRAK1BP1
ENSG00000270362	HMGN3-AS1
ENSG00000083097	DOP1A
ENSG00000228679	NA
ENSG00000135334	AKIRIN2
ENSG00000025039	RRAGD
ENSG00000233797	NA
ENSG00000014123	UFL1
ENSG00000123545	NDUFAF4
ENSG00000146263	MMS22L
ENSG00000286084	NA
ENSG00000146285	SCML4
ENSG00000112367	FIG4
ENSG00000074935	TUBE1
ENSG00000230943	LINC02541
ENSG00000111817	DSE
ENSG00000111875	ASF1A
ENSG00000146350	TBC1D32
ENSG00000025156	HSF2
ENSG00000118518	RNF146
ENSG00000227945	NA
ENSG00000203756	TMEM244
ENSG00000164484	TMEM200A
ENSG00000146399	TAAR1
ENSG00000112299	VNN1
ENSG00000112303	VNN2
ENSG00000146411	SLC2A12
ENSG00000231028	AHI1-DT
ENSG00000171408	PDE7B
ENSG00000286313	NA
ENSG00000197442	MAP3K5
ENSG00000027697	IFNGR1
ENSG00000112378	PERP
ENSG00000051620	HEBP2
ENSG00000010818	HIVEP2
ENSG00000135521	LTV1
ENSG00000135604	STX11
ENSG00000146414	SHPRH
ENSG00000146425	DYNLT1
ENSG00000092820	EZR
ENSG00000197081	IGF2R
ENSG00000085511	MAP3K4
ENSG00000026297	RNASET2
ENSG00000227704	NA
ENSG00000008018	PSMB1
ENSG00000282572	NA
ENSG00000178381	ZFAND2A
ENSG00000159904	ZNF890P
ENSG00000106346	USP42
ENSG00000136238	RAC1
ENSG00000236609	ZNF853
ENSG00000106443	PHF14
ENSG00000106460	TMEM106B
ENSG00000183742	MACC1
ENSG00000136243	NUP42
ENSG00000188732	FAM221A
ENSG00000153790	C7orf31
ENSG00000214870	LINC02981
ENSG00000146592	CREB5
ENSG00000105778	AVL9
ENSG00000211695	TRGV9
ENSG00000136279	DBNL
ENSG00000146674	IGFBP3
ENSG00000106070	GRB10
ENSG00000129103	SUMF2
ENSG00000173041	ZNF680
ENSG00000146757	ZNF92
ENSG00000182487	NCF1B
ENSG00000009954	BAZ1B
ENSG00000086730	LAT2
ENSG00000158517	NCF1
ENSG00000274523	RCC1L
ENSG00000165178	NCF1C
ENSG00000223705	NSUN5P1
ENSG00000005486	RHBDD2
ENSG00000243566	UPK3B
ENSG00000186088	GSAP
ENSG00000127947	PTPN12
ENSG00000075213	SEMA3A
ENSG00000004766	VPS50
ENSG00000127995	CASD1
ENSG00000127990	SGCE
ENSG00000242265	PEG10
ENSG00000164715	LMTK2
ENSG00000164713	BRI3
ENSG00000106245	BUD31
ENSG00000166997	CNPY4
ENSG00000106351	AGFG2
ENSG00000172354	GNB2
ENSG00000146828	SLC12A9
ENSG00000087077	TRIP6
ENSG00000169871	TRIM56
ENSG00000230257	NFE4
ENSG00000170629	DPY19L2P2
ENSG00000105821	DNAJC2
ENSG00000239569	NA
ENSG00000135249	RINT1
ENSG00000286076	NA
ENSG00000128590	DNAJB9
ENSG00000173114	LRRN3
ENSG00000105976	MET
ENSG00000198898	CAPZA2
ENSG00000106328	FSCN3
ENSG00000128594	LRRC4
ENSG00000106348	IMPDH1
ENSG00000205085	GARIN1A
ENSG00000128596	CCDC136
ENSG00000064419	TNPO3
ENSG00000146842	TMEM209
ENSG00000233559	NA
ENSG00000286458	NA
ENSG00000146859	TMEM140
ENSG00000155561	NUP205
ENSG00000146966	DENND2A
ENSG00000090263	MRPS33
ENSG00000257743	MGAM2
ENSG00000237702	TRBV3-1
ENSG00000211745	TRBV4-2
ENSG00000211721	TRBV6-5
ENSG00000211749	TRBV23-1
ENSG00000197448	GSTK1
ENSG00000170260	ZNF212
ENSG00000240449	NA
ENSG00000242258	LINC00996
ENSG00000133574	GIMAP4
ENSG00000106560	GIMAP2
ENSG00000013374	NUB1
ENSG00000243836	WDR86-AS1
ENSG00000055609	KMT2C
ENSG00000184863	RBM33
ENSG00000126870	DYNC2I1
ENSG00000106018	VIPR2
ENSG00000253853	NA
ENSG00000173295	FAM86B3P
ENSG00000175806	MSRA
ENSG00000183638	RP1L1
ENSG00000154328	NEIL2
ENSG00000168546	GFRA2
ENSG00000104635	SLC39A14
ENSG00000173530	TNFRSF10D
ENSG00000042980	ADAM28
ENSG00000104756	KCTD9
ENSG00000104228	TRIM35
ENSG00000147419	CCDC25
ENSG00000253690	NA
ENSG00000120875	DUSP4
ENSG00000104687	GSR
ENSG00000165392	WRN
ENSG00000197140	ADAM32
ENSG00000188676	IDO2
ENSG00000070718	AP3M2
ENSG00000070501	POLB
ENSG00000165102	HGSNAT
ENSG00000228801	PCMTD1-DT
ENSG00000137574	TGS1
ENSG00000104331	BPNT2
ENSG00000215114	UBXN2B
ENSG00000137575	SDCBP
ENSG00000287975	NA
ENSG00000254802	NA
ENSG00000104442	ARMC1
ENSG00000205268	PDE7A
ENSG00000175073	VCPIP1
ENSG00000104218	CSPP1
ENSG00000247570	NA
ENSG00000140396	NCOA2
ENSG00000178860	MSC
ENSG00000147601	TERF1
ENSG00000154582	ELOC
ENSG00000205189	ZBTB10
ENSG00000076641	PAG1
ENSG00000253214	LOC105375924
ENSG00000104231	ZFAND1
ENSG00000133739	LRRCC1
ENSG00000176731	RBIS
ENSG00000176571	CNBD1
ENSG00000123119	NECAB1
ENSG00000253738	OTUD6B-AS1
ENSG00000155100	OTUD6B
ENSG00000164953	TMEM67
ENSG00000164941	INTS8
ENSG00000156172	CFAP418
ENSG00000164919	COX6C
ENSG00000164934	DCAF13
ENSG00000253796	NA
ENSG00000147654	EBAG9
ENSG00000172172	MRPL13
ENSG00000214814	FER1L6
ENSG00000168672	LRATD2
ENSG00000254275	NA
ENSG00000129295	DNAAF11
ENSG00000105339	DENND3
ENSG00000130193	THEM6
ENSG00000014164	ZC3H3
ENSG00000185189	NRBP2
ENSG00000186583	SPATC1
ENSG00000261236	BOP1
ENSG00000182325	FBXL6
ENSG00000167702	KIFC2
ENSG00000170619	COMMD5
ENSG00000107099	DOCK8
ENSG00000147853	AK3
ENSG00000120217	CD274
ENSG00000175893	ZDHHC21
ENSG00000164975	SNAPC3
ENSG00000164985	PSIP1
ENSG00000147889	CDKN2A
ENSG00000096872	IFT74
ENSG00000147894	C9orf72
ENSG00000235453	SMIM27
ENSG00000086065	CHMP5
ENSG00000235481	NA
ENSG00000168795	ZBTB5
ENSG00000137054	POLR1E
ENSG00000274349	ZNF658
ENSG00000234506	NA
ENSG00000268364	NA
ENSG00000119121	TRPM6
ENSG00000134996	OSTF1
ENSG00000197969	VPS13A
ENSG00000156052	GNAQ
ENSG00000148019	CEP78
ENSG00000106829	TLE4
ENSG00000083223	TUT7
ENSG00000165025	SYK
ENSG00000165030	NFIL3
ENSG00000185963	BICD2
ENSG00000232063	NA
ENSG00000136929	HEMGN
ENSG00000095380	NANS
ENSG00000119514	GALNT12
ENSG00000066697	MSANTD3
ENSG00000106692	FKTN
ENSG00000070061	ELP1
ENSG00000070159	PTPN3
ENSG00000157654	PALM2AKAP2
ENSG00000106853	PTGR1
ENSG00000165181	SHOC1
ENSG00000224067	NA
ENSG00000119471	HSDL2
ENSG00000136866	ZFP37
ENSG00000119321	FKBP15
ENSG00000173077	DELEC1
ENSG00000119401	TRIM32
ENSG00000106780	MEGF9
ENSG00000226752	CUTALP
ENSG00000119403	PHF19
ENSG00000171448	ZBTB26
ENSG00000239705	NA
ENSG00000165219	GAPVD1
ENSG00000167113	COQ4
ENSG00000204054	NA
ENSG00000107290	SETX
ENSG00000123453	SARDH
ENSG00000235106	BRD3OS
ENSG00000196363	WDR5
ENSG00000165661	QSOX2
ENSG00000148384	INPP5E
ENSG00000176248	ANAPC2
ENSG00000165802	NSMF
ENSG00000233013	NA
ENSG00000281849	NA
ENSG00000011201	ANOS1
ENSG00000101849	TBL1X
ENSG00000101911	PRPS2
ENSG00000101916	TLR8
ENSG00000046651	OFD1
ENSG00000046653	GPM6B
ENSG00000181544	FANCB
ENSG00000102010	BMX
ENSG00000169891	REPS2
ENSG00000131831	RAI2
ENSG00000283380	NA
ENSG00000243055	NA
ENSG00000185753	CXorf38
ENSG00000124486	USP9X
ENSG00000188937	NYX
ENSG00000171657	GPR82
ENSG00000229491	NA
ENSG00000102218	RP2
ENSG00000102265	TIMP1
ENSG00000102312	PORCN
ENSG00000015285	WAS
ENSG00000102057	KCND1
ENSG00000068400	GRIPAP1
ENSG00000102007	PLP2
ENSG00000184205	TSPYL2
ENSG00000130119	GNL3L
ENSG00000001497	LAS1L
ENSG00000089472	HEPH
ENSG00000184634	MED12
ENSG00000196338	NLGN3
ENSG00000147174	GCNA
ENSG00000186810	CXCR3
ENSG00000204116	CHIC1
ENSG00000131263	RLIM
ENSG00000187325	TAF9B
ENSG00000078589	P2RY10
ENSG00000147138	GPR174
ENSG00000078596	ITM2A
ENSG00000072133	RPS6KA6
ENSG00000124429	POF1B
ENSG00000157514	TSC22D3
ENSG00000101842	VSIG1
ENSG00000188153	COL4A5
ENSG00000126016	AMOT
ENSG00000175556	LONRF3
ENSG00000286163	NA
ENSG00000085185	BCORL1
ENSG00000156531	PHF6
ENSG00000227060	LINC00629
ENSG00000173275	ZNF449
ENSG00000234062	NA
ENSG00000176988	FMR1NB
ENSG00000171100	MTM1
ENSG00000102181	CD99L2
ENSG00000287918	NA
ENSG00000198910	L1CAM
ENSG00000130827	PLXNA3
ENSG00000185973	TMLHE
