# Supplementary material for: Predicting trajectories of acute illness using RNA velocity of whole blood
Source: Research Square preprint supplement (doi:10.21203/rs.3.rs-5764288/v1), 2025-02-03
Supplement: Supplementary file 2 [file 6d47e55e51d6c5d7d768c806.docx]

**Supplementary Information**

**Participating recruitment sites and ethical approvals for the PERFORM study**

| Country | Site | Ethical Approval Reference |
| --- | --- | --- |
| Spain | Hospital Clínico Universitario de Santiago de Compostela | 2016/331 |
| United Kingdom | St Mary’s Hospital, Imperial College Healthcare NHS Trust, London  Alder Hey Children’s Hospital, Liverpool  Great North Children’s Hospital, Newcastle upon-  Tyne  John Radcliffe Hospital, Oxford  Royal Alexandra Children’s Hospital, Brighton | 16/LO/1684 |
| Netherlands | Sophia’s Children’s Hospital, Rotterdam  Academic Medical Centre, Amsterdam  Radboud UMC, Nijmegen | NL58103.091.16 |
| Greece | P. and A. Kyriakou Children’s Hospital, Athens | 415/13.06.16 |
| Austria | Medizinische Universität Graz, Graz | 28-518 ex 15/16 |
| Slovenia | University Medical Centre Ljubljana | 0120-483/2016-3 |
| Latvia | Children’s Clinical University Hospital, Riga | 1/16-07-14 |
| Germany | Dr. von Hauner Children's Hospital, Ludwig-  Maximilians-University, Munich | 699-16 |
| Switzerland | University Children’s Hospital, Universität Bern, Bern | 2016-01835 |

**Members of the PERFORM Consortium**

**PARTNER: Imperial College, London, UK**

Chief investigator/PERFORM coordinator: Michael Levin1

Imperial College: Faculty of Medicine1 (in alphabetical order)

Aubrey Cunnington, Tisham De, Jethro A Herberg, Myrsini Kaforou, Victoria J Wright1

Imperial College: consortium members1 (in alphabetical order)

Lucas Baumard, Evangelos Bellos, Giselle D’Souza, Rachel Galassini, Dominic Habgood-Coote, Shea Hamilton, Clive Hoggart, Sara Hourmat, Heather Jackson, Naomi Lin, Ian Maconochie, Stephanie Menikou, Samuel Nichols, Ruud Nijman, Ivonne Pena Paz, Oliver Powell, Priyen Shah, Ortensia Vito, Clare Wilson

Imperial College: Faculty of Engineering2

Molly Stevens (co-investigator), Eunjung Kim, Nayoung Kim

Imperial College Healthcare NHS Trust3: clinical recruitment (alphabetical order)

Amina Abdulla, Ladan Ali, Sarah Darnell, Rikke Jorgensen, Sobia Mustafa, Salina Persand

PERFORM UK Clinical Network: Clinical recruitment at Brighton and Sussex University Hospitals4

Katy Fidler (principal investigator), Julia Dudley, Vivien Richmond, Emma Tavliavini

Author Affiliations:

1. Section of Paediatric Infectious Disease, Sir Alexander Fleming Building, Exhibition Road, London, SW7 2AZ, UK
2. Department of Materials, Royal School of Mines, Prince Consort Rd, London SW7 2AZ, UK
3. Children’s Clinical Research Unit, St Mary’s Hospital, Praed Street, London W2 1NY, UK
4. Royal Alexandra Children’s Hospital, Brighton, BN2 5BE, UK.

**PARTNER: University of Liverpool, UK**

Principal Investigator: Enitan D Carrol1,2,3

Research Group (in alphabetical order):

Elizabeth Cocklin1, Rebecca Jennings4, Joanne Johnston4, Aakash Khanijau1, Simon Leigh1, Nadia Lewis-Burke1, Karen Newall4, Sam Romaine1

Author Affiliations:

1. Department of Clinical Infection, Microbiology and Immunology, University of Liverpool Institute of Infection and Global Health, Liverpool, England
2. Alder Hey Children’s Hospital, Department of Infectious Diseases, Eaton Road, Liverpool, L12 2AP
3. Liverpool Health Partners, 1st Floor, Liverpool Science Park, 131 Mount Pleasant, Liverpool, L3 5TF
4. Alder Hey Children’s Hospital, Clinical Research Business Unit, Eaton Road, Liverpool, L12 2AP

**PARTNER: University of Oxford, UK**

Principal Investigators: Andrew J. Pollard1,2, Rama Kandasamy1,2, Stéphane Paulus1,2

Additional Investigators

Michael J. Carter1,2, Daniel O'Connor1,2, Sagida Bibi1,2, Dominic F. Kelly1,2, Meeru Gurung3, Stephen Thorson3, Imran Ansari3, David R. Murdoch4, Shrijana Shrestha3, Zoe Oliver5

Author Affiliations:

1. Oxford Vaccine Group, Department of Paediatrics, University of Oxford, Oxford, United Kingdom.
2. NIHR Oxford Biomedical Research Centre, Oxford, United Kingdom.
3. Paediatric Research Unit, Patan Academy of Health Sciences, Kathmandu, Nepal.
4. Department of Pathology, University of Otago, Christchurch, New Zealand.
5. Department of Paediatrics, University of Oxford.

**PARTNER: Newcastle University, Newcastle upon Tyne, UK**

Principal Investigator: Marieke Emonts1,2,3

Co-investigators: Emma Lim2,3,7, Lucille Valentine4

Recruitment team (alphabetical), data-managers, and GNCH Research unit:

Karen Allen5, Kathryn Bell5, Adora Chan5, Stephen Crulley5, Kirsty Devine5, Daniel Fabian5, Sharon King5, Paul McAlinden5, Sam McDonald5, Anne McDonnell2,5, Ailsa Pickering2,5, Evelyn Thomson5, Amanda Wood5, Diane Wallia5, Phil Woodsford5, Frances Baxter5, Ashley Bell5, Mathew Rhodes5

Additional Investigators

Rachel Agbeko8, Christine Mackerness8, Bryan Baas2, Lieke Kloosterhuis2, Wilma Oosthoek2, Tasnim Arif6, Joshua Bennet2, Kalvin Collings2, Ilona van der Giessen2, Alex Martin2, Aqeela Rashid6, Emily Rowlands2, Gabriella de Vries2, Fabian van der Velden2 , Joshua Soon2, Lucille Valentine4, Mike Martin9, Ravi Mistry2, Lucille Valentine4

Author Affiliations:

1. Translational and Clinical Research Institute, Newcastle University, Newcastle upon Tyne UK
2. Great North Children’s Hospital, Paediatric Immunology, Infectious Diseases & Allergy, Newcastle upon Tyne Hospitals NHS Foundation Trust, Newcastle upon Tyne, United Kingdom.
3. NIHR Newcastle Biomedical Research Centre based at Newcastle upon Tyne Hospitals NHS Trust and Newcastle University, Westgate Rd, Newcastle upon Tyne NE4 5PL, United Kingdom
4. Newcastle University Business School, Centre for Knowledge, Innovation, Technology and Enterprise (KITE), Newcastle upon Tyne, United Kingdom
5. Great North Children’s Hospital, Research Unit, Newcastle upon Tyne Hospitals NHS Foundation Trust, Newcastle upon Tyne, United Kingdom.
6. Great North Children’s Hospital, Paediatric Oncology, Newcastle upon Tyne Hospitals NHS Foundation Trust, Newcastle upon Tyne, United Kingdom.
7. Population Health Sciences Institute, Newcastle University, Newcastle upon Tyne, UK
8. Great North Children’s Hospital, Paediatric Intensive Care Unit, Newcastle upon Tyne Hospitals NHS Foundation Trust, Newcastle upon Tyne, United Kingdom.
9. Northumbria University, Newcastle upon Tyne, United Kingdom

**PARTNER: London School of Hygiene and Tropical Medicine, UK**

Principal Investigator: Shunmay Yeung1,2 3

Research Group

Dr Juan Emmanuel Dewez1,Martin Hibberd 1, David Bath2, Alec Miners2, Ruud Nijman3, Elizabeth Fitchett

Author Affiliations:

1. Faculty of Infectious and Tropical Disease, London School of Hygiene and Tropical Medicine, London, UK
2. Faculty of Public Health and Policy, London School of Hygiene and Tropical Medicine, London, UK
3. Department of Paediatrics, St. Mary’s Hospital Imperial College Hospital, London, UK
4. Faculty of Epidemiology and Population Health, London School of Hygiene and Tropical Medicine, London, UK

**PARTNER: Micropathology Ltd, Warwick, UK**

Principal Investigator: Colin Fink

Additional investigators

Marie Voice, Leo Calvo-Bado

Author Affiliations:

Micropathology Ltd, The Venture Center, University of Warwick Science Park, Sir William Lyons Road, Coventry, CV4 7EZ

**PARTNER: SERGAS, Santiago de Compostela, Spain**

Principal Investigators: Federico Martinón-Torres1, Antonio Salas1,2

GENVIP RESEARCH GROUP (in alphabetical order):

Fernando Álvez González1, Cristina Balo Farto1, Ruth Barral-Arca1,2, María Barreiro Castro1, Xabier Bello1,2, Mirian Ben García1, Sandra Carnota1, Miriam Cebey-López1, María José Curras-Tuala1,2, Carlos Durán Suárez1, Luisa García Vicente1, Alberto Gómez-Carballa1,2, Jose Gómez Rial1, Pilar Leboráns Iglesias1, Federico Martinón-Torres1, Nazareth Martinón-Torres1, José María Martinón Sánchez1, Belén Mosquera Pérez1, Jacobo Pardo-Seco1,2, Lidia Piñeiro Rodríguez1, Sara Pischedda1,2, Sara Rey Vázquez1, Irene Rivero Calle1, Carmen Rodríguez-Tenreiro1, Lorenzo Redondo-Collazo1, Miguel Sadiki Ora1, Antonio Salas1,2, Sonia Serén Fernández1, Cristina Serén Trasorras1, Marisol Vilas Iglesias1.

Author Affiliations:

1. Translational Pediatrics and Infectious Diseases, Pediatrics Department, Hospital Clínico Universitario de Santiago, Santiago de Compostela, Spain, and GENVIP Research Group (www.genvip.org), Instituto de Investigación Sanitaria de Santiago, Universidad de Santiago de Compostela, Galicia, Spain.
2. Unidade de Xenética, Departamento de Anatomía Patolóxica e Ciencias Forenses, Instituto de Ciencias Forenses, Facultade de Medicina, Universidade de Santiago de Compostela, and GenPop Research Group, Instituto de Investigaciones Sanitarias (IDIS), Hospital Clínico Universitario de Santiago, Galicia, Spain
3. Fundación Pública Galega de Medicina Xenómica, Servizo Galego de Saúde (SERGAS), Instituto de Investigaciones Sanitarias (IDIS), and Grupo de Medicina Xenómica, Centro de Investigación Biomédica en Red de Enfermedades Raras (CIBERER), Universidade de Santiago de Compostela (USC), Santiago de Compostela, Spain

**PARTNER: Erasmus MC - Sophia Children’s Hospital, Rotterdam, The Netherlands**

Principal Investigators: Henriëtte A. Moll1, Clementien L Vermont2

Research group

Dorine M. Borensztajn1, Nienke N. Hagedoorn1, Chantal Tan1, Joany Zachariasse1, W Dik3

Author Affiliations:

1. Erasmus MC-Sophia Children’s Hospital, Department of General Paediatrics, Rotterdam, the Netherlands
2. Erasmus MC-Sophia Children’s Hospital, Department of Paediatric Infectious Diseases & Immunology, Rotterdam, the Netherlands
3. Erasmus MC, Department of immunology, Rotterdam, the Netherlands

**PARTNER: Radboud University Medical Center (RUMC),** **Nijmegen,** **The Netherlands**

Principal Investigators: Ronald de Groot1, Michiel van der Flier1,2,3, Marien I. de Jonge1

Co-investigators Radboud University Medical Center (in alphabetical order):

Koen van Aerde1,2, Wynand Alkema1, Bryan van den Broek1, Jolein Gloerich1, Alain J. van Gool1, Stefanie Henriet1,2, Martijn Huijnen1, Ria Philipsen1, Esther Willems1

Investigators PeDBIG PERFORM DUTCH CLINICAL NETWORK (in alphabetical order):

G.P.J.M. Gerrits8, M. van Leur8,J. Heidema 4, L. de Haan1,2, C.J. Miedema 5, C. Neeleman1, C.C. Obihara6, G.A. Tramper-Stranders6,7

Author Affiliations:

1. Radboud University Medical Center, Nijmegen, The Netherlands
2. Amalia Children’s Hospital, Nijmegen, The Netherlands
3. Wilhelmina Children’s Hospital, University Medical Center Utrecht, Utrecht, The Netherlands
4. St. Antonius Hospital, Nieuwegein, The Netherlands
5. Catharina Hospital, Eindhoven, The Netherlands
6. ETZ Elisabeth, Tilburg, The Netherlands
7. Franciscus Gasthuis, Rotterdam, The Netherlands
8. Canisius Wilhelmina Hospital, Nijmegen, The Netherlands

**PARTNER: Academic Medical Hospital & Sanquin Research Institute, Amsterdam, The Netherlands**

Principal Investigator: Taco Kuijpers1,2

Co-investigators: Ilse Jongerius2

Recruitment team:

J.M. van den Berg1, D. Schonenberg1, A.M. Barendregt1, D. Pajkrt1, M. van der Kuip1,3, A.M. van Furth1,3

Students and technical support:

Evelien Sprenkeler2, Judith Zandstra2, G. van Mierlo2, J. Geissler2

Author Affiliations:

1. Amsterdam University Medical Center (Amsterdam UMC), location Academic Medical Center (AMC), Dept of Pediatric Immunology, Rheumatology and Infectious Diseases, University of Amsterdam, Amsterdam, the Netherlands
2. Sanquin Research Institute, & Landsteiner Laboratory at the AMC, University of Amsterdam, Amsterdam, the Netherlands.
3. Amsterdam University Medical Center (Amsterdam UMC), location Vrije Universiteit Medical Center (VUMC), Dept of Pediatric Infectious Diseases and Immunology, Free University (VU), Amsterdam, the Netherlands (former affiliation)

**PARTNER: Riga Stradins University, Latvia**

Principal Investigator: Dace Zavadska1,2

Other RSU group authors (in alphabetical order):

Anda Balode1,2, Arta Bārzdiņa1,2, Dārta Deksne1,2, Dace Gardovska1,2, Dagne Grāvele2, Ilze Grope1,2, Anija Meiere1,2, Ieva Nokalna1,2, Jana Pavāre1,2, Zanda Pučuka1,2, Katrīna Selecka1,2, Aleksandra Rudzāte1,2, Dace Svile2, Urzula Nora Urbāne1,2

Author Affiliations:

1. Riga Stradins university, Riga, Latvia.
2. Children clinical university hospital, Riga, Latvia.

**PARTNER: Medical University of Graz (MUG), Austria**

Principal Investigator: Werner Zenz1

Co-investigators (in alphabetical order)

Benno Kohlmaier1, Nina A. Schweintzger1, Manfred G. Sagmeister1

Research team

Daniela S. Kohlfürst1, Christoph Zurl1, Alexander Binder1

Recruitment team, data managers, (in alphabetical order):

Susanne Hösele1, Manuel Leitner1, Lena Pölz1, Glorija Rajic1,

Clinical recruitment partners (in alphabetical order):

Sebastian Bauchinger1, Hinrich Baumgart4, Martin Benesch3, Astrid Ceolotto1, Ernst Eber2, Siegfried Gallistl1, Gunther Gores5, Harald Haidl1, Almuthe Hauer1, Christa Hude1, Markus Keldorfer5, Larissa Krenn4, Heidemarie Pilch5, Andreas Pfleger2, Klaus Pfurtscheller4, Gudrun Nordberg5, Tobias Niedrist8, Siegfried Rödl4, Andrea Skrabl-Baumgartner1, Matthias Sperl7, Laura Stampfer5, Volker Strenger3, Holger Till6, Andreas Trobisch5, Sabine Löffler5

Author Affiliations:

1. Department of Pediatrics and Adolescent Medicine, Division of General Pediatrics, Medical University of Graz, Graz, Austria
2. Department of Pediatric Pulmonology, Medical University of Graz, Graz, Austria
3. Department of Pediatric Hematooncoloy, Medical University of Graz, Graz, Austria
4. Paediatric Intensive Care Unit, Medical University of Graz, Graz, Austria
5. University Clinic of Paediatrics and Adolescent Medicine Graz, Medical University Graz, Graz,Austria
6. Department of Paediatric and Adolescence Surgery, Medical University Graz, Graz, Austria
7. Department of Pediatric Orthopedics, Medical University Graz, Graz, Austria
8. Clinical Institute of Medical and Chemical Laboratory Diagnostics, Medical University Graz, Graz, Austria

**PARTNER: Hauner Children’s Hospital, LMU Munich, Germany**

Principal Investigator: Ulrich von Both1,2

Research group:

Laura Kolberg¹, Manuela Zwerenz¹, Judith Buschbeck¹

Clinical recruitment partners (in alphabetical order):

Christoph Bidlingmaier3, Vera Binder4, Katharina Danhauser5, Nikolaus Haas10, Matthias Griese6, Tobias Feuchtinger4, Julia Keil9, Matthias Kappler6, Eberhard Lurz7, Georg Muench8, Karl Reiter9, Carola Schoen9

Author Affiliations:

1. Div. Paediatric Infectious Diseases, Hauner Children’s Hospital, University Hospital, Ludwig Maximilians University (LMU), Munich, Germany
2. German Center for Infection Research (DZIF), Partner Site Munich, Munich, Germany
3. Div. of General Paediatrics,
4. Div. Paediatric Haematology & Oncology,
5. Div. of Paediatric Rheumatology,
6. Div. of Paediatric Pulmonology,
7. Div. of Paediatric Gastroenterology,
8. Neonatal Intensive Care Unit,
9. Paediatric Intensive Care Unit Hauner Children’s Hospital,
10. Department Pediatric Cardiology and Pediatric Intensive Care, University Hospital, LMU, Munich, Germany

**PARTNER: National and Kapodistrian University of Athens (NKUA), Greece**

Principal investigator: Maria Tsolia

Investigator/Research fellow: Irini Eleftheriou

Additional investigators:

Maria Tambouratzi, Antonis Marmarinos, Marietta Xagorari, Kelly Syggelou

Author Affiliations:

2nd Department of Pediatrics, National and Kapodistrian University of Athens, “P. and A. Kyriakou” Children’s Hospital, Thivon and Levadias, Goudi, Athens

**PARTNER: Swiss Pediatric Sepsis Study, Switzerland**

Principal Investigators: Philipp Agyeman1, Luregn J Schlapbach2,3

Clinical recruitment at University Children’s Hospital Bern for PERFORM:

Christoph Aebi1, Verena Wyss1, Mariama Usman1

Principal and co-investigators for the Swiss Pediatric Sepsis Study:

Eric Giannoni4,5, Martin Stocker6, Klara M Posfay-Barbe7, Ulrich Heininger8, Sara Bernhard-Stirnemann9, Anita Niederer-Loher10, Christian Kahlert10, Giancarlo Natalucci11, Christa Relly12, Thomas Riedel13, Christoph Aebi1, Christoph Berger12

Author Affiliations:

1. Department of Pediatrics, Inselspital, Bern University Hospital, University of Bern, Switzerland
2. Neonatal and Pediatric Intensive Care Unit, Children’s Research Center, University Children’s Hospital Zurich, University of Zurich, Zurich, Switzerland
3. Child Health Research Centre, University of Queensland, and Queensland Children`s Hospital, Brisbane, Australia
4. Clinic of Neonatology, Department Mother-Woman-Child, Lausanne University Hospital and University of Lausanne, Switzerland
5. Infectious Diseases Service, Department of Medicine, Lausanne University Hospital and University of Lausanne, Switzerland
6. Department of Pediatrics, Children’s Hospital Lucerne, Lucerne, Switzerland
7. Pediatric Infectious Diseases Unit, Children’s Hospital of Geneva, University Hospitals of Geneva, Geneva, Switzerland
8. Infectious Diseases and Vaccinology, University of Basel Children’s Hospital, Basel, Switzerland
9. Children’s Hospital Aarau, Aarau, Switzerland
10. Division of Infectious Diseases and Hospital Epidemiology, Children’s Hospital of Eastern Switzerland St. Gallen, St. Gallen, Switzerland
11. Department of Neonatology, University Hospital Zurich, Zurich, Switzerland
12. Division of Infectious Diseases and Hospital Epidemiology, and Children’s Research Center, University Children’s Hospital Zurich, Switzerland
13. Children’s Hospital Chur, Chur, Switzerland

**PARTNER: Department of Infectious Diseases, University Medical Centre Ljubljana, Slovenia**

Principal Investigator: Marko Pokorn1,2,3

Research Group:

Mojca Kolnik1, Katarina Vincek1, Tina Plankar Srovin1, Natalija Bahovec1, Petra Prunk1, Veronika Osterman1, Tanja Avramoska1

Author Affiliations:

1. Department of Infectious Diseases, University Medical Centre Ljubljana, Japljeva 2, SI-1525 Ljubljana, Slovenia
2. University Childrens' Hospital, University Medical Centre Ljubljana, Ljubljana, Slovenia
3. Department of Infectious Diseases and Epidemiology, Faculty of Medicine, University of Ljubljana, Slovenia

**PARTNER: bioMérieux, France**

Principal Investigator: François Mallet1,2, 3

Research Group:

Karen Brengel-Pesce1,2, 3, Alexandre Pachot1, Marine Mommert-Tripon1,2

Author Affiliations:

1. Department of Recherche & Development, bioMérieux S.AMarcy l'Etoile, France
2. Joint research unit Hospice Civils de Lyon - bioMérieux, Centre Hospitalier Lyon Sud, 165 Chemin du Grand Revoyet, 69310 Pierre-Bénite, France

**PARTNER: Medical Research Council Unit The Gambia (MRCG) at LSHTM**

Principal Investigator: Effua Usuf

Additional Investigators

Kalifa Bojang, Syed M. A. Zaman, Fatou Secka, Suzanne Anderson, Anna RocaIsatou Sarr, Momodou Saidykhan, Saffiatou Darboe, Samba Ceesay, Umberto D’alessandro

Author Affiliations:

Medical Research Council Unit The Gambia at LSHTM, P O Box 273, Fajara, The Gambia

**PARTNER: National Cheng Kung University Hospital, Taiwan**

Principal Investigator: Ching-Fen Shen

Co-investigator: Ching-Chuan Liu, Shih-Min Wang

funded by the Center of Clinical Medicine Research, National Cheng Kung University
